# Supplementary material
Source: PubMed Central journal article supplement (PMC5074650)

**SPIROMICS Protocol for Multicenter Quantitative CT  
to Phenotype the Lungs**

**Jered P. Sieren, John D. Newell Jr, R. Graham Barr, Eugene R. Bleeker,  
Nathan Burnette, Elizabeth E. Carretta, David Couper, Jonathan Goldin,  
Junfeng Guo, MeiLan K Han, Nadia N. Hansel, Richard E. Kanner,  
Ella A. Kazerooni, Fernando J Martinez, Stephen Rennard, Prescott G. Woodruff,  
and Eric A. Hoffman for the SPIROMICS Research Group**

**ONLINE DATA SUPPLEMENT**

## On line supplement

### Procedural Verification Software : PVS

The study coordinator logs a subject into the PVS system and enters the study ID, scan date, and BMI. PVS then selects [one of] the site's approved CT scanner(s) and provides an appropriate scan protocol including the selected scanner, mA or mAs (based on BMI), kV, pitch, rotation speed, kernel, slice thickness, and spacing. Most importantly, if the subject is on a return visit, the system will find the subject's previous scanner and scan parameters; and these parameters, including the DFOV, will be used for the follow-up scan, critical for high quality longitudinal QCT results. In SPIROMICS, the baseline and follow-up (visit 1 and visit 2) scans are one year apart.

PVS parameters are displayed in the user interface and can be printed for hand-off to the radiology technologist. The radiology technologist or coordinator fills out the form and the technologist carries out an initial visual quality check of the scan quality, which includes assessment of positioning and whether a breath hold was achieved and maintained at the specified lung volume. Once the scan is completed the coordinator enters the information into PVS from the printed form. The scan technologist is identified for monitoring purposes. The coordinator must also select their own name as overseeing the visit. At this stage the scan is complete. Incorrect entries trigger a PVS alert as the coordinator is typing by highlighting the issue in red (supplemental **Figure 2b-S**). The coordinator, upon alert, either fixes the issue. If the issue cannot be fixed, the radiology center will designate the scan as a protocol exception classified as either a deviation or quality control (QC) error. Deviations refer to scanning errors associated with improper application of the imaging protocol leading to either an under or over radiation exposure relative to that prescribed by the MOP. QC errors are related to quality of the image data, unrelated to radiation dose. Examples of deviations include incorrect mA or mAs for a given BMI, wrong kV, pitch, rotation speed, or the scan covered more or less than the specified z-axis coverage. Example QC issues include motion artifacts, metal artifacts (rhinestone buttons, bras, etc.), and reconstructing the images with the wrong kernel, slice thickness or slice spacing. Radiation issues are flagged as deviations and reported to the Radiology Center. Reports are sent via PVS to the site same day or next working day

depending upon time of transmission. After PVS reporting is complete, CT image data are transmitted via DISPATCH, discussed below.

### **DICOM Selection Parser and Transfer Check software: DISPATCH**

DISPATCH runs on the transferring site's local computer and uses a web-based application transfer images. The software directly links to the Radiology Center scan database, taking into account the trial protocol, including the number of visits, the type and timing of data collection and the subject identification number. In addition, DISPATCH will de-identify data according to the 18 HIPAA criteria to assure HIPAA compliance upon upload. This will allow all subject identifiers to be automatically removed prior to sending the data to the Radiology Center without removing other required important scan information. DISPATCH allows the user to ensure data was acquired according to the specific CT study protocol and checks for errors prior to data transmission. If scanning was not carried out appropriately, the site is notified immediately at the time of data transfer. This offers two advantages: 1) if the scan was reconstructed incorrectly (wrong kernel or incorrect DFOV) the data can be re-reconstructed if the raw projection data remains on the CT scanner's hard drives; 2) if there are other errors the site can learn from the mistake and avoid propagation to the next subjects CT study.

**Table 1-S:**

CT-derived Metrics along with their variable names and the lung volume from which they derived. Researchers interested in using SPIROMICS data should read the information in the “Obtaining SPIROMICS data” tab on the study web site at <https://www2.csc.unc.edu/spiromics/>.

| <b>SPIROMICS CT Density Variables Description</b>                                               | <b>Variable Name</b>                 | <b>CT Lung Volume</b> |
|-------------------------------------------------------------------------------------------------|--------------------------------------|-----------------------|
| Both lungs: Percentage of low attenuation area below and including -950 Hounsfield units        | both_percent_below_950               | CT TLC                |
| Both lungs: Percentage of low attenuation area below and including -910 Hounsfield units        | both_percent_below_910               | CT TLC                |
| Left lower lobe: Percentage of low attenuation area below and including -950 Hounsfield units   | left-lower_percent_below_950         | CT TLC                |
| Left lower lobe: Percentage of low attenuation area below and including -910 Hounsfield units   | left-lower_percent_below_910         | CT TLC                |
| Left upper lobe: Percentage of low attenuation area below and including -950 Hounsfield units   | left-upper_percent_below_950         | CT TLC                |
| Left upper lobe: Percentage of low attenuation area below and including -910 Hounsfield units   | left-upper_percent_below_910         | CT TLC                |
| Right lower lobe: Percentage of low attenuation area below and including -950 Hounsfield units  | right-lower_percent_below_950        | CT TLC                |
| Right lower lobe: Percentage of low attenuation area below and including -910 Hounsfield units  | right-lower_percent_below_910        | CT TLC                |
| Right middle lobe: Percentage of low attenuation area below and including -950 Hounsfield units | right-middle_percent_below_950       | CT TLC                |
| Right middle lobe: Percentage of low attenuation area below and including -910 Hounsfield units | right-middle_percent_below_910       | CT TLC                |
| Right upper lobe: Percentage of low attenuation area below and including -950 Hounsfield units  | right-upper_percent_below_950        | CT TLC                |
| Right upper lobe: Percentage of low attenuation area below and including -910 Hounsfield units  | right-upper_percent_below_910        | CT TLC                |
| Both lungs: Percentage of low attenuation area below and -856 Hounsfield units                  | both_percent_below_856               | CT RV                 |
| Left lower third: Percentage of low attenuation area below and -856 Hounsfield units            | thirds-left-lower_percent_below_856  | CT RV                 |
| Left middle third: Percentage of low attenuation area below and -856 Hounsfield units           | thirds-left-middle_percent_below_856 | CT RV                 |
| Left upper third: Percentage of low attenuation area below and -856 Hounsfield units            | thirds-left-upper_percent_below_856  | CT RV                 |
| Right lower third: Percentage of low attenuation area below and -856 Hounsfield units           | thirds-right-lower_percent_below_856 | CT RV                 |
| Right middle third: Percentage of low attenuation                                               | thirds-right-                        | CT RV                 |

|                                                                                        |                                       |                       |
|----------------------------------------------------------------------------------------|---------------------------------------|-----------------------|
| area below and -856 Hounsfield units                                                   | middle_percent_below_856              |                       |
| Right upper third: Percentage of low attenuation area below and -856 Hounsfield units  | thirds-right-upper_percent_below_856  | CT RV                 |
| Left lower third: Percentage of low attenuation area below and -910 Hounsfield units   | thirds-left-lower_percent_below_910   | CT TLC                |
| Left middle third: Percentage of low attenuation area below and -910 Hounsfield units  | thirds-left-middle_percent_below_910  | CT TLC                |
| Left upper third: Percentage of low attenuation area below and -910 Hounsfield units   | thirds-left-upper_percent_below_910   | CT TLC                |
| Right lower third: Percentage of low attenuation area below and -910 Hounsfield units  | thirds-right-lower_percent_below_910  | CT TLC                |
| Right middle third: Percentage of low attenuation area below and -910 Hounsfield units | thirds-right-middle_percent_below_910 | CT TLC                |
| Right upper third: Percentage of low attenuation area below and -910 Hounsfield units  | thirds-right-upper_percent_below_910  | CT TLC                |
| Left lower third: Percentage of low attenuation area below and -950 Hounsfield units   | thirds-left-lower_percent_below_950   | CT TLC                |
| Left middle third: Percentage of low attenuation area below and -950 Hounsfield units  | thirds-left-middle_percent_below_950  | CT TLC                |
| Left upper third: Percentage of low attenuation area below and -950 Hounsfield units   | thirds-left-upper_percent_below_950   | CT TLC                |
| Right lower third: Percentage of low attenuation area below and -950 Hounsfield units  | thirds-right-lower_percent_below_950  | CT TLC                |
| Right middle third: Percentage of low attenuation area below and -950 Hounsfield units | thirds-right-middle_percent_below_950 | CT TLC                |
| Right upper third: Percentage of low attenuation area below and -950 Hounsfield units  | thirds-right-upper_percent_below_950  | CT TLC                |
| Left Lung %<-950: Apex divided by Base                                                 | l_apex_base_pctbe950_ratio            | CT TLC                |
| Left Lung %<-910: Apex divided by Base                                                 | l_apex_base_pctbe910_ratio            | CT TLC                |
| Right Lung %<-950: Apex divided by Base                                                | r_apex_base_pctbe950_ratio            | CT TLC                |
| Right Lung %<-910: Apex divided by Base                                                | r_apex_base_pctbe910_ratio            | CT TLC                |
| <b>SPIROMICS CT Airway Variables Description</b>                                       | <b>Variable name</b>                  | <b>CT Lung Volume</b> |
| Pi10 value for airways with an inner perimeter <= 20mm on LB1 path and subtree         | pi10_lb1_path_and_subtree_leq20       | CT TLC                |
| Pi10 value for airways with an inner perimeter <= 20mm on LB10 path and subtree        | pi10_lb10_path_and_subtree_leq20      | CT TLC                |
| Pi10 value for airways with an inner perimeter <= 20mm on LB4 path and subtree         | pi10_lb4_path_and_subtree_leq20       | CT TLC                |
| Pi10 value for airways with an inner perimeter <= 20mm on RB1 path and subtree         | pi10_rb1_path_and_subtree_leq20       | CT TLC                |
| Pi10 value for airways with an inner perimeter <= 20mm on RB10 path and subtree        | pi10_rb10_path_and_subtree_leq20      | CT TLC                |

|                                                                                                                                                                                                                                                                                   |                                   |        |
|-----------------------------------------------------------------------------------------------------------------------------------------------------------------------------------------------------------------------------------------------------------------------------------|-----------------------------------|--------|
| 20mm on RB10 path and subtree                                                                                                                                                                                                                                                     | q20                               |        |
| Pi10 value for airways with an inner perimeter <= 20mm on RB4 path and subtree                                                                                                                                                                                                    | pi10_rb4_path_and_subtree_leq20   | CT TLC |
| Pi10 value for airways with an inner perimeter <= 20mm on whole airway tree                                                                                                                                                                                                       | pi10_whole_tree_leq20             | CT TLC |
| Pi10 value for airways with an inner perimeter <= 20mm on right airway tree                                                                                                                                                                                                       | pi10_right_lung_leq20             | CT TLC |
| Pi10 value for airways with an inner perimeter <= 20mm on left airway tree                                                                                                                                                                                                        | pi10_left_lung_leq20              | CT TLC |
| The thickest pi10_leq20 of the 5 standardized paths (eliminating segments with inner perimeter > than 20mm)                                                                                                                                                                       | RB1_chld_avgavgwalthick50         | CT TLC |
| The average pi10_leq20 of the 5 standardized paths (eliminating segments with inner perimeter > than 20mm)                                                                                                                                                                        | RB10_chld_avgavgwalthick50        | CT TLC |
| <b>FOR 5 SEGMENTALS AND TWO GENERATIONS BEYOND:</b>                                                                                                                                                                                                                               |                                   |        |
| Wall thickness (At every centerline voxel position the wall thickness at every half-degree, for total of 720 measurements. These average values are averaged along the middle 1/3 of the airway segment to obtain the Average Average Wall Thickness.)                            | avgavgwallthickness               | CT TLC |
| Wall thickness for middle 50% of segments (At every centerline voxel position the wall thickness at every half-degree, for total of 720 measurements. These average values are averaged along the middle 1/3 of the airway segment to obtain the Average Average Wall Thickness.) | avgwallthickness_50               | CT TLC |
| Average of the avgwallthickness_50 for two children of Rb1                                                                                                                                                                                                                        | RB1_child_avgavgwallthickness_50  | CT TLC |
| Average of the avgwallthickness_50 for two children of Rb10                                                                                                                                                                                                                       | RB10_child_avgavgwallthickness_50 | CT TLC |
| Wall area (avgouterarea - avginnerarea)                                                                                                                                                                                                                                           | avgwallarea                       | CT TLC |
| Wall area % ((avgouterarea - avginnerarea)/avgouterarea)                                                                                                                                                                                                                          | avgwallarea_percent               | CT TLC |
| Length of segmental airway (Measured between parent-branchpoint and child-branchpoint. The center line length represents the true path length, i.e. it follows the curvature of the segment.)                                                                                     | centerlinelength                  | CT TLC |
| Branch angle (Angle between a segment and its parent segment)                                                                                                                                                                                                                     | angle                             | CT TLC |
| Lumen area                                                                                                                                                                                                                                                                        | avginnerarea                      | CT TLC |

|                                                                                                                                                                                                                                          |                                  |                       |
|------------------------------------------------------------------------------------------------------------------------------------------------------------------------------------------------------------------------------------------|----------------------------------|-----------------------|
| Average diameter (At every centerline voxel position along the middle 1/3 of the airway segment the inner equivalent circle diameter is determined. These measurements are then averaged into Average Inner Equivalent Circle Diameter.) | avginnerequivalentcirclediameter | CT TLC                |
| Tapering ratio (comparing lumen area or diameter at 30% and 70% distances along a segment)                                                                                                                                               | taper_ratio                      | CT TLC                |
| Average taper ratio of the two children of Rb1                                                                                                                                                                                           | Rb1_chld_taper_avgratio          | CT TLC                |
| Average taper ratio of the two children of Rb10                                                                                                                                                                                          | Rb10_chld_taper_avgratio         | CT TLC                |
| <b>SPRIONICS LAC (alpha) Variable Description</b>                                                                                                                                                                                        | <b>Variable Name</b>             | <b>CT Lung Volume</b> |
| Both lungs: Slope at -910                                                                                                                                                                                                                | both_slope_below_910             | CT TLC                |
| Both lungs: Total intercept at -910                                                                                                                                                                                                      | both_intercept_below_910         | CT TLC                |
| Both lungs: Total R-squared at -910                                                                                                                                                                                                      | both_r_squared_below_910         | CT TLC                |
| Left lung: Slope at -910                                                                                                                                                                                                                 | left_slope_below_910             | CT TLC                |
| Left lung: Total intercept at -910                                                                                                                                                                                                       | left_intercept_below_910         | CT TLC                |
| Left lung: Total R-squared at -910                                                                                                                                                                                                       | left_r_squared_below_910         | CT TLC                |
| Left lower lobe: Total intercept at -910                                                                                                                                                                                                 | left-lower_slope_below_910       | CT TLC                |
| Left lower lobe: Total R-squared at -910                                                                                                                                                                                                 | left-lower_intercept_below_910   | CT TLC                |
| Left lower lobe: Slope at -910                                                                                                                                                                                                           | left-lower_r_squared_below_910   | CT TLC                |
| Left upper lobe: Total intercept at -910                                                                                                                                                                                                 | left-upper_slope_below_910       | CT TLC                |
| Left upper lobe: Total R-squared at -910                                                                                                                                                                                                 | left-upper_intercept_below_910   | CT TLC                |
| Left upper lobe: Slope at -910                                                                                                                                                                                                           | left-upper_r_squared_below_910   | CT TLC                |
| Right lung: Slope at -910                                                                                                                                                                                                                | right_slope_below_910            | CT TLC                |
| Right lung: Total intercept at -910                                                                                                                                                                                                      | right_intercept_below_910        | CT TLC                |
| Right lung: Total R-squared at -910                                                                                                                                                                                                      | right_r_squared_below_910        | CT TLC                |
| Right lower lobe: Total intercept at -910                                                                                                                                                                                                | right-lower_slope_below_910      | CT TLC                |
| Right lower lobe: Total R-squared at -910                                                                                                                                                                                                | right-lower_intercept_below_910  | CT TLC                |
| Right lower lobe: Slope at -910                                                                                                                                                                                                          | right-lower_r_squared_below_910  | CT TLC                |
| Right middle lobe: Total intercept at -910                                                                                                                                                                                               | right-middle_slope_below_910     | CT TLC                |
| Right middle lobe: Total R-squared at -910                                                                                                                                                                                               | right-middle_intercept_below_910 | CT TLC                |
| Right middle lobe: Slope at -910                                                                                                                                                                                                         | right-middle_r_squared_below_910 | CT TLC                |
| Right upper lobe: Total intercept at -910                                                                                                                                                                                                | right-upper_slope_below_910      | CT TLC                |
| Right upper lobe: Total R-squared at -910                                                                                                                                                                                                | right-upper_intercept_below_910  | CT TLC                |

|                                                                   |                                  |        |
|-------------------------------------------------------------------|----------------------------------|--------|
| Right upper lobe: Slope at -910                                   | right-upper_r_squared_below_910  | CT TLC |
| Both lungs: Slope at -950                                         | both_slope_below_950             | CT TLC |
| Both lungs: Total intercept at -950                               | both_intercept_below_950         | CT TLC |
| Both lungs: Total R-squared at -950                               | both_r_squared_below_950         | CT TLC |
| Left lung: Slope at -950                                          | left_slope_below_950             | CT TLC |
| Left lung: Total intercept at -950                                | left_intercept_below_950         | CT TLC |
| Left lung: Total R-squared at -950                                | left_r_squared_below_950         | CT TLC |
| Left lower lobe: Total intercept at -950                          | left-lower_slope_below_950       | CT TLC |
| Left lower lobe: Total R-squared at -950                          | left-lower_intercept_below_950   | CT TLC |
| Left lower lobe: Slope at -950                                    | left-lower_r_squared_below_950   | CT TLC |
| Left upper lobe: Total intercept at -950                          | left-upper_slope_below_950       | CT TLC |
| Left upper lobe: Total R-squared at -950                          | left-upper_intercept_below_950   | CT TLC |
| Left upper lobe: Slope at -950                                    | left-upper_r_squared_below_950   | CT TLC |
| Right lung: Slope at -950                                         | right_slope_below_950            | CT TLC |
| Right lung: Total intercept at -950                               | right_intercept_below_950        | CT TLC |
| Right lung: Total R-squared at -950                               | right_r_squared_below_950        | CT TLC |
| Right lower lobe: Total intercept at -950                         | right-lower_slope_below_950      | CT TLC |
| Right lower lobe: Total R-squared at -950                         | right-lower_intercept_below_950  | CT TLC |
| Right lower lobe: Slope at -950                                   | right-lower_r_squared_below_950  | CT TLC |
| Right middle lobe: Total intercept at -950                        | right-middle_slope_below_950     | CT TLC |
| Right middle lobe: Total R-squared at -950                        | right-middle_intercept_below_950 | CT TLC |
| Right middle lobe: Slope at -950                                  | right-middle_r_squared_below_950 | CT TLC |
| Right upper lobe: Total intercept at -950                         | right-upper_slope_below_950      | CT TLC |
| Right upper lobe: Total R-squared at -950                         | right-upper_intercept_below_950  | CT TLC |
| Right upper lobe: Slope at -950                                   | right-upper_r_squared_below_950  | CT TLC |
| Alpha (LAC) Apex minus Base with holes defined at -910_right lung | lac_r_apex_base_slp_910dif       | CT TLC |
| Alpha (LAC) Apex minus Base with holes defined at -910_left lung  | lac_l_apex_base_slp_910dif       | CT TLC |
| Alpha (LAC) Apex minus Base with holes defined at -950_right lung | lac_r_apex_base_slp_950dif       | CT TLC |
| Alpha (LAC) Apex minus Base with holes defined at -950_left lung  | lac_l_apex_base_slp_950dif       | CT TLC |



| <b>SPIROMICE CORE/PEEL (2cm) Variable Descriptions</b>                                        | <b>Variable Name</b> | <b>CT Lung Volume</b> |
|-----------------------------------------------------------------------------------------------|----------------------|-----------------------|
| Both lungs: vessel volume                                                                     | B_vessel_vx          | CT TLC                |
| Both lungs: vessel percent                                                                    | B_vessel_percent     | CT TLC                |
| Both lungs: core vessel volume                                                                | BC_vessel_vx         | CT TLC                |
| Both lungs: core vessel percent                                                               | BC_vessel_percent    | CT TLC                |
| Both lungs: core percentage of low attenuation area below and including -950 Hounsfield units | BC_%be_950           | CT TLC                |
| Both lungs: core percentage of low attenuation area below and including -910 Hounsfield units | BC_%be_910           | CT TLC                |
| Both lungs: peel vessel volume                                                                | BP_vessel_vx         | CT TLC                |
| Both lungs: peel vessel percent                                                               | BP_vessel_percent    | CT TLC                |
| Both lungs: peel percentage of low attenuation area below and including -950 Hounsfield units | BP_%be_950           | CT TLC                |
| Both lungs: peel percentage of low attenuation area below and including -910 Hounsfield units | BP_%be_910           | CT TLC                |
| Right lung: core vessel volume                                                                | RC_vessel_vx         | CT TLC                |
| Right lung: core vessel percent                                                               | RC_vessel_percent    | CT TLC                |
| Right lung: core percentage of low attenuation area below and including -950 Hounsfield units | RC_%be_950           | CT TLC                |
| Right lung: core percentage of low attenuation area below and including -910 Hounsfield units | RC_%be_910           | CT TLC                |
| Right lung: peel vessel volume                                                                | RP_vessel_vx         | CT TLC                |
| Right lung: peel vessel percent                                                               | RP_vessel_percent    | CT TLC                |
| Right lung: peel percentage of low attenuation area below and including -950 Hounsfield units | RP_%be_950           | CT TLC                |
| Right lung: peel percentage of low attenuation area below and including -910 Hounsfield units | RP_%be_910           | CT TLC                |
| Left lung: core vessel volume                                                                 | LC_vessel_vx         | CT TLC                |
| Left lung: core vessel percent                                                                | LC_vessel_percent    | CT TLC                |
| Left lung: core percentage of low attenuation area below and including -950 Hounsfield units  | LC_%be_950           | CT TLC                |
| Left lung: core percentage of low attenuation area below and including -910 Hounsfield units  | LC_%be_910           | CT TLC                |
| Left lung: peel vessel volume                                                                 | LP_vessel_vx         | CT TLC                |
| Left lung: peel vessel percent                                                                | LP_vessel_percent    | CT TLC                |
| Left lung: peel percentage of low attenuation area below and including -950 Hounsfield units  | LP_%be_950           | CT TLC                |
| Left lung: peel percentage of low attenuation area below and including -910 Hounsfield units  | LP_%be_910           | CT TLC                |

Percentage of Total Voxels

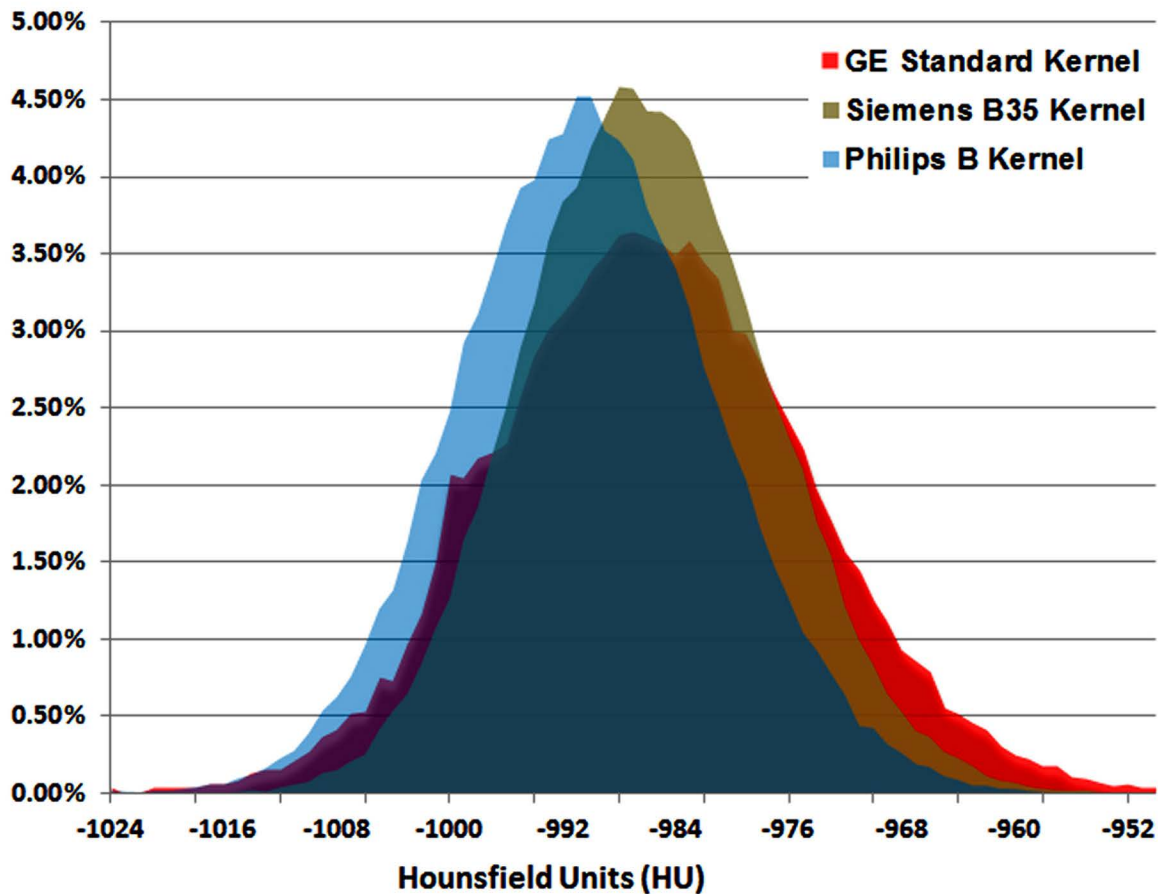

Percentage of Total Voxels

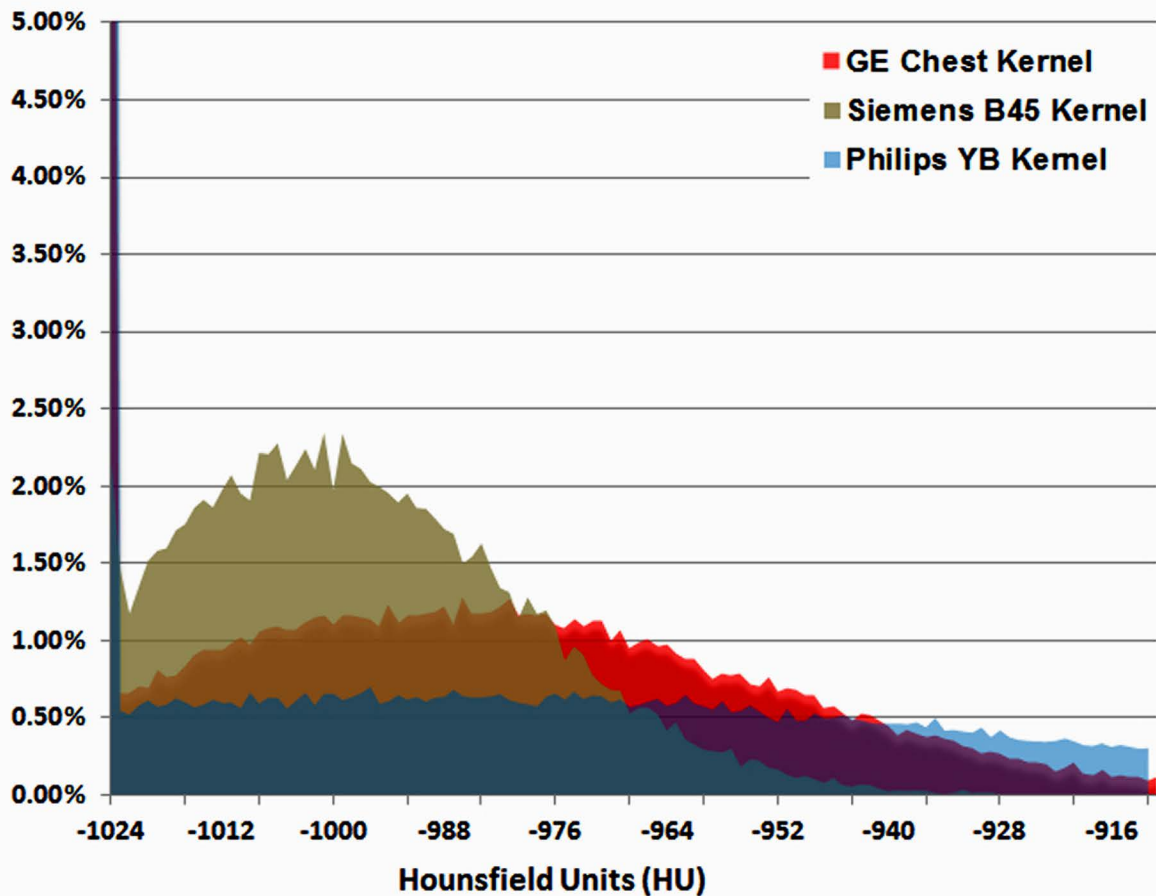

## Pending Scan

[Register a Scan](#)[In Process](#)[Pending](#)[Reviewed](#)[Need Attention](#)[Deviations](#)[Quality Control Errors](#)[Contact List](#)[My Account](#)

Tools and Reports

[Download PVS Report](#)

Data Center Operations

[Update Scan Status](#)[List Users](#)[List Technologists](#)[Add a Site](#)[Add a User](#)[Add a Technologist](#)

Site ID: **UMich**

User ID: **sierenj**

SPIROMICS ID: **MU**

Visit Number: **1**

CT Acquisition Date:  \* (format yyyy-mm-dd)

Subject BMI: **36.4**

Please select the scanner that was used for this study

Scanner Doses  
(Needed for this Study)

|                                  | Size  | Manufacturer       | Model              | SFOV  | Inspiratory<br>mA | Expiratory<br>mA |
|----------------------------------|-------|--------------------|--------------------|-------|-------------------|------------------|
| <input checked="" type="radio"/> | LARGE | GE MEDICAL SYSTEMS | DISCOVERY CT750 HD | LARGE | 270               | 145              |

CT Image Acquisition \*

| Verified                            | Scan        | SFOV  | mA  | kV  | DFOV | CT Dose Index<br>(CTDI) (mGy) |
|-------------------------------------|-------------|-------|-----|-----|------|-------------------------------|
| <input checked="" type="checkbox"/> | INSPIRATION | LARGE | 270 | 120 | 37   | 10.54                         |
| <input checked="" type="checkbox"/> | EXPIRATION  | LARGE | 145 | 120 | 37   | 5.63                          |

CT Image Quality \*

Adequate Inspiratory Scan?  Yes  No

Motion Artifact?  Yes  No

Inclusion of All Parts of Lungs?  Yes  No

Adequate Expiratory Scan?  Yes  No

Pitch:  \*Slice Separation:  \*

Scans Archived?  Yes  No

Scans De-identified?  Yes  No

Scans Transmitted via DISPATCH?  Yes  No

Imaging Technologist:  \*

Comments:

Admin Notes:  
(visible only by Administrator)Contact Radiology Center: [I-CLIC Information](#)

## Pending Scan

[Register a Scan](#)[In Process](#)[Pending](#)[Reviewed](#)[Need Attention](#)[Deviations](#)[Quality Control Errors](#)[Contact List](#)[My Account](#)[Tools and Reports](#)[Download PVS Report](#)[Data Center Operations](#)[Update Scan Status](#)[List Users](#)[List Technologists](#)[Add a Site](#)[Add a User](#)[Add a Technologist](#)

Site ID: **UMich**

User ID: **sierenje**

SPIROMICS ID: **MU**

Visit Number: **1**

CT Acquisition Date: **2013-07-09** \* (format: yyyy-mm-dd)

Subject BMI: **36.4**

Please select the scanner that was used for this study

Scanner Doses  
(Needed for this Study)

|                                  | Size  | Manufacturer       | Model              | SFOV  | Inspiratory mA | Expiratory mA |
|----------------------------------|-------|--------------------|--------------------|-------|----------------|---------------|
| <input checked="" type="radio"/> | LARGE | GE MEDICAL SYSTEMS | DISCOVERY CT750 HD | LARGE | 270            | 145           |

CT Image Acquisition \*

| Verified                            | Scan        | SFOV  | mA  | kV  | DFOV | CT Dose Index (CTDI) (mGy) |
|-------------------------------------|-------------|-------|-----|-----|------|----------------------------|
| <input checked="" type="checkbox"/> | INSPIRATION | LARGE | 270 | 120 | 34   | 10.54                      |
| <input checked="" type="checkbox"/> | EXPIRATION  | LARGE | 145 | 120 | 37   | 5.63                       |

CT Image Quality \*

Adequate Inspiratory Scan?  Yes  No

Motion Artifact?  Yes  No

Inclusion of All Parts of Lungs?  Yes  No

Adequate Expiratory Scan?  Yes  No

Pitch:  \*Slice Separation:  \*

Scans Archived?  Yes  No

Scans De-identified?  Yes  No

Scans Transmitted via DISPATCH?  Yes  No

Imaging Technologist:  \*

Comments:

Form Errors:

\* Inspiration DFOV and expiration DFOV values do not match.

Admin Notes:  
(visible only by Administrator)Contact Radiology Center: [I-CLIC Information](#)

## Project Setup

Current Working Directory:

patch training set\PIT01\_PHANTOM\PIT01\_PHANTOM

Browse

Current Project:

COPDGene

Validate

DISPATCH™

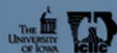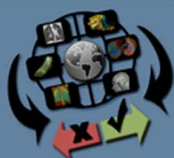

## Project Validation

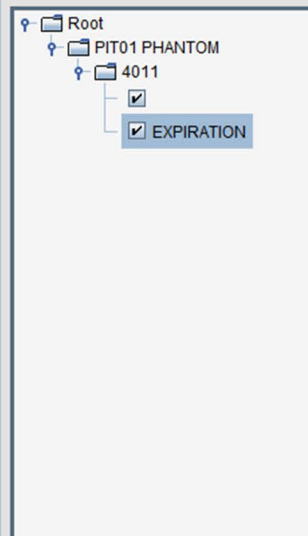

| Attribute              | Dicom Value                 | Expected Value(s)           | Error Message |
|------------------------|-----------------------------|-----------------------------|---------------|
| AcquisitionDate        | 20090706                    |                             |               |
| AcquisitionTime        | 073800                      |                             |               |
| Columns                | 512                         | 512                         |               |
| gantryDetectorTilt     | 0.0                         | 0.0                         |               |
| ImageType              | ORIGINAL PRIMARY AXIAL      |                             |               |
| InstitutionName        | UPMC Health System Presby   |                             |               |
| KVP                    | 120                         | 120                         |               |
| Manufacturer           | GE MEDICAL SYSTEMS          | GE MEDICAL SYSTEMS,PHILL... |               |
| PatientID              | PIT01 PHANTOM               |                             |               |
| PatientName            | PIT01 PHANTOM               |                             |               |
| PatientPosition        | HFS                         | HFS,FFS                     |               |
| PixelSpacing           |                             |                             |               |
| ProtocolName           | 5.46 GENETIC EPIDEMIOLOG... |                             |               |
| ReconstructionDiameter | 365.0                       | Range(350.0 ,375.0)         |               |
| Rows                   | 512                         | 512                         |               |
| SoftwareVersion        | 07MW18.4                    |                             |               |
| StationName            | ct1x                        |                             |               |
| StudyDate              | 20090706                    |                             |               |
| StudyTime              | 073151                      |                             |               |
| Slice Spacing          | 0.5                         | 0.5                         |               |
| ExposureTime           | 500.0                       | 500.0                       |               |
| FilterType             | BODY FILTER                 | BODY FILTER                 |               |
| ManufacturerModelName  | LIGHT SPEED VCT             | LIGHTSPEED VCT,LIGHTSPEE... |               |
| Pitch-GE-range         |                             |                             |               |
| SliceThickness         | 0.625                       | 0.625                       |               |

Upload Checked

Start Over

INFO: There are 131 files in this series.  
 INFO: The manufacturer is GE MEDICAL S  
 INFO: The model is LIGHTSPEED VCT.

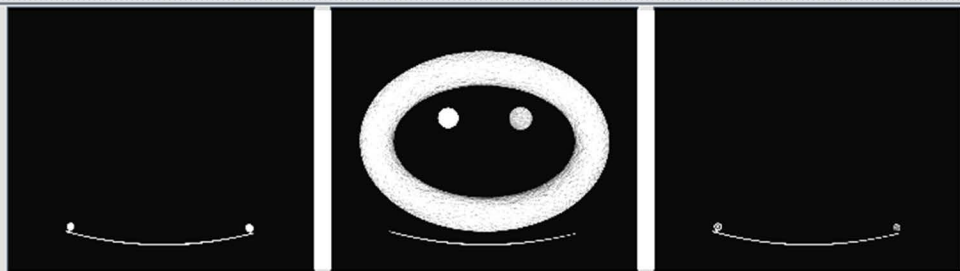

Supplement: 10.1164_rccm.201506-1208PP_sieren_data_supplement.pdf [file 10.1164_rccm.201506-1208PP_sieren_data_supplement.pdf]
